# Supplementary material
Source: MDPI journal article supplement (https://www.mdpi.com/2079-6412/13/3/562)
Supplement: s1 [file s1]

## Supplementary Materials – Table S1

Equation 17 is obtained as follows:

| Step no. | Equation                                                                                                                                                         |
|----------|------------------------------------------------------------------------------------------------------------------------------------------------------------------|
| 1        | $V_{film} = \frac{m_{coating}}{\rho_{film}}$                                                                                                                     |
| 2        | $V_{film} = \delta_{film} \times A_{seeds}$                                                                                                                      |
| 3        | $V_{film} = \delta_{film} \times A_{seeds} / N_{seeds}$                                                                                                          |
| 4        | $\frac{V_{film}}{N_{seeds}} = \delta_{film} \times \frac{A_{seeds}}{N_{seeds}}$                                                                                  |
| 5        | $\frac{V_{film}}{N_{seeds}} = \delta_{film} \times \frac{A_{seeds}}{m_{seeds}} \times m_{seed,mean}$                                                             |
| 6        | $\frac{V_{film}}{N_{seeds}} = \delta_{film} \times \frac{A_{seeds}}{m_{seeds}} \times m_{seed,mean}$                                                             |
| 7        | $V_{film} = \delta_{film} \times \frac{A_{seeds}}{\rho_{seeds} \times V_{seeds}} \times m_{seed,mean} \times N_{seeds}$                                          |
| 8        | $\frac{m_{coating}}{\rho_{film}} = \delta_{film} \times \frac{A_{seeds}}{\rho_{seeds} \times V_{seeds}} \times m_{seeds}$                                        |
| 9        | $m_{coating} = \delta_{film} \times \frac{\rho_{film}}{\rho_{seeds}} \times \frac{A_{seeds}}{V_{seeds}} \times m_{seeds}$                                        |
| 10       | $\delta_{film} = f(m_{coating}) = \frac{\rho_{seeds}}{\rho_{film}} \times \frac{V_{seeds}}{A_{seeds}} \times \frac{1}{m_{seeds}} \times \eta \times m_{coating}$ |
